# Supplementary material for: Electric dipole moment-assisted charge extraction and effective defect passivation in perovskite solar cells by depositing a PCBM:TIPD blend film on a CH3NH3PbI3 layer
Source: Royal Society of Chemistry journal article supplement (doi:10.1039/c9tc03881g), 2019-01-01
Supplement: c9tc03881g1.pdf [file c9tc03881g1.pdf]

## Supplementary information for

Electric dipole moment-assisted charge extraction and effective defect passivation in PH1000-based perovskite solar cells by incorporating PCBM and TIPD into CH<sub>3</sub>NH<sub>3</sub>PbI<sub>3</sub> layer

Yujuan Weng,<sup>a§</sup> Zhitao Shen,<sup>a§</sup> Mingxuan Guo,<sup>a</sup> Fan Wu<sup>c</sup>, Fumin Li<sup>a</sup>, Liangxin Zhu,<sup>a</sup> Lanyu Ling,<sup>b</sup> Chong Chen<sup>a\*</sup>

<sup>a</sup>*Henan Key Laboratory of Photovoltaic Materials, Henan University, Kaifeng 475004, P.R.China,*

<sup>b</sup>*School of Physics and Electronics, Henan University, Kaifeng 475004, P.R.China*

<sup>c</sup>*School of science and key lab of optoelectronic material and device, Huzhou University, Huzhou, 313000, P.R.China*

### 1. First-principles calculations

Electronic structure calculations are performed with the density functional theory as implemented in the Vienna ab initio simulation package,<sup>1,2</sup> employing projected augmented wave potentials to describe the atomic core electrons and a plane wave basis set with a kinetic energy cutoff of 480 eV to expand the Kohn–Sham electronic states. For the exchange and correlation functional, we used the generalized gradient approximation (GGA) in the Perdew–Burke–Ernzerhof (PBE) form.<sup>3</sup> In order to account for interactions between CH<sub>3</sub>NH<sub>3</sub>PbI<sub>3</sub> and TIPD, a periodic slab model was constructed. A 2 × 2 (17.6 Å × 17.6 Å) tetragonal CH<sub>3</sub>NH<sub>3</sub>PbI<sub>3</sub> (001) surface with 5 atomic layers was cut from the optimized bulk geometry in a previous study.<sup>4</sup> The TIPD molecule was adsorbed on one of the surfaces, and a 20 Å vacuum layer was added along the *z* direction. The Brillouin zone sampling was restricted to the  $\Gamma$  point due to the large supercell size, which consists of 259 atoms in total. The DFT-D3 method with Becke–Jonson damping<sup>5</sup> was adopted to include van der Waals interactions. During structural optimization, the three atomic layers of CH<sub>3</sub>NH<sub>3</sub>PbI<sub>3</sub> far away from the TIPD were fixed, and the other two atomic layers of CH<sub>3</sub>NH<sub>3</sub>PbI<sub>3</sub> and the TIPD were relaxed until the residual forces were less than 0.05 eV Å<sup>-1</sup>. Static calculations based on the optimized geometry were performed for the charge density analysis.

In addition, an isolated MA molecule was optimized using the B3LYP<sup>6,7</sup> exchange and correlation

---

E-mail: chongchen@henu.edu.cn (Dr. Chong Chen)

functional combining with the aug-cc-pVDZ basis set to obtain its electric dipole moment, electronic density and electrostatic potential (ESP). The calculations were performed by Gaussian 09 program.<sup>8</sup>

#### References:

1. Kresse, G.; Hafner, J. *Phys. Rev. B* 1993, **47**, R558
2. Kresse, G.; Furthmüller, J. *Phys. Rev. B* 1996, **54**, 11169
3. Perdew, J. P.; Burke, K.; Ernzerhof, M. *Phys. Rev. Lett.*, 1996, **77**, 3865.
4. Feng, J.; Xiao, B. *J. Phys. Chem. Lett.*, 2014, **5**, 1278.
5. Grimme, S.; Ehrlich, S.; Goerigk, L. *J. Comp. Chem.*, 2011, **32**, 1456.
6. Becke, A. D. *J. Chem. Phys.*, 1993, **98**, 5648.
7. Lee, C.; Yang, W.; Parr, R. G. *Phys. Rev. B: Condens. Matter*, 1988, **37**, 785.
8. Frisch, M. J.; Trucks, G. W.; Schlegel, H. B.; et al., *Gaussian 09 (Revision D.01)*, Gaussian Inc., Wallingford CT, 2013.

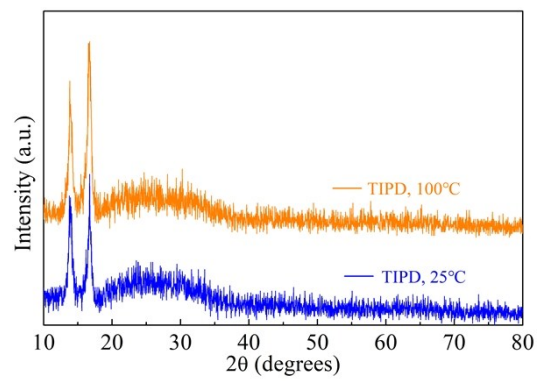

Fig. S1 XRD patterns of the prepared TIPD films dried at 25°C and 100°C, respectively.

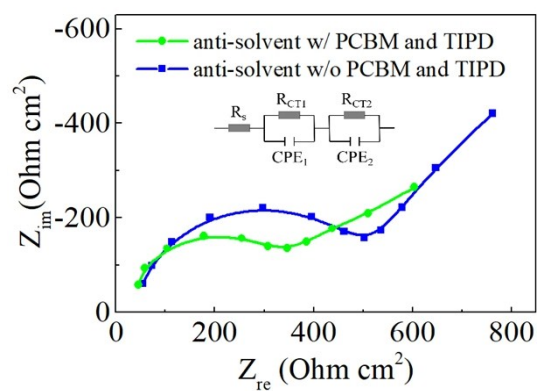

Fig. S2 Electrochemical impedance spectra (EIS) of the PSCs under illumination  $100 \text{ mW/cm}^2$ .

**Table S1** The fitting parameters for measured EIS results with different device.

| Sample                                                | $R_s$ ( $\Omega \cdot cm^2$ ) | $R_{CT1}$ ( $mA \cdot cm^2$ ) | $R_{CT2}$ ( $mA \cdot cm^2$ ) | $CPE_1$ ( $\mu F \cdot cm^2$ ) | $CPE_2$ ( $nF \cdot cm^2$ ) |
|-------------------------------------------------------|-------------------------------|-------------------------------|-------------------------------|--------------------------------|-----------------------------|
| PSCs with PCBM:TIPD-blended<br>anti-solvent treatment | 22.81                         | 774.9                         | 274.4                         | 2.28                           | 6.27                        |
| PSCs with CBZ anti-solvent<br>treatment               | 38.64                         | 1875                          | 452.6                         | 1.56                           | 11.9                        |
